# Supplementary material
Source: MDPI journal article supplement (https://www.mdpi.com/2571-6255/1/2/23)
Supplement: s1 [file s1]

Archive with 4 entries (4 files):
- BakerTableS1.pdf
- BakerTableS2.pdf
- DataS1.zip
- DataS3.zip
